# Supplementary material for: Lope y Calderón, Vázquez y Hugo, Maastricht y Breda
Source: MDPI journal article supplement (doi:10.3390/ph15081026), 1963-01-01
Supplement: s1 [file s1]

# The effect of 1,2,4-triazole-3-thiol derivatives bearing hydrazone moiety on cancer cell migration and growth of melanoma, breast and pancreatic cancer spheroids

Aida Šermukšnytė<sup>1</sup>, Kristina Kantminienė<sup>2\*</sup>, Ilona Jonuškienė<sup>1</sup>, Ingrida Tumosienė<sup>1</sup>, and Vilma Petrikaitė<sup>3\*</sup>

<sup>1</sup> Department of Organic Chemistry, Kaunas University of Technology, Radvilėnų pl. 19, 50254 Kaunas, Lithuania

<sup>2</sup> Department of Physical and Inorganic Chemistry, Kaunas University of Technology, Radvilėnų pl. 19, 50254 Kaunas, Lithuania

<sup>3</sup> Laboratory of Drug Targets Histopathology, Institute of Cardiology, Lithuanian University of Health Sciences, Sukilėlių pr. 13, 50162 Kaunas, Lithuania

\* Correspondence: kristina.kantminiene@ktu.lt (K.K.); vilma.petrikaite@lsmuni.lt (V.P.)

## Table of contents

**Figure S1.** <sup>1</sup>H NMR (400 MHz, DMSO-d<sub>6</sub>) spectrum of **1**

**Figure S2.** <sup>13</sup>C NMR (101 MHz, DMSO-d<sub>6</sub>) spectrum of **1**

**Figure S3.** HRMS spectrum of **1**

**Figure S4.** <sup>1</sup>H NMR (400 MHz, DMSO-d<sub>6</sub>) spectrum of **2**

**Figure S5.** <sup>13</sup>C NMR (101 MHz, DMSO-d<sub>6</sub>) spectrum of **2**

**Figure S6.** HRMS spectrum of **2**

**Figure S7.** <sup>1</sup>H NMR (400 MHz, DMSO-d<sub>6</sub>) spectrum of **3**

**Figure S8.** <sup>13</sup>C NMR (101 MHz, DMSO-d<sub>6</sub>) spectrum of **3**

**Figure S9.** HRMS spectrum of **3**

**Figure S10.** <sup>1</sup>H NMR (400 MHz, DMSO-d<sub>6</sub>) spectrum of **4**

**Figure S11.** <sup>13</sup>C NMR (101 MHz, DMSO-d<sub>6</sub>) spectrum of **4**

**Figure S12.** HRMS spectrum of **4**

**Figure S13.** <sup>1</sup>H NMR (400 MHz, DMSO-d<sub>6</sub>) spectrum of **5**

**Figure S14.** <sup>13</sup>C NMR (101 MHz, DMSO-d<sub>6</sub>) spectrum of **5**

**Figure S15.** HRMS spectrum of **5**

**Figure S16.** <sup>1</sup>H NMR (400 MHz, DMSO-d<sub>6</sub>) spectrum of **6**

**Figure S17.** <sup>13</sup>C NMR (400 MHz, DMSO-d<sub>6</sub>) spectrum of **6**

**Figure S18.** HRMS spectrum of **6**

**Figure S19.**  $^1\text{H}$  NMR (400 MHz,  $\text{DMSO-d}_6$ ) spectrum of **7**

**Figure S20.**  $^{13}\text{C}$  NMR (101 MHz,  $\text{DMSO-d}_6$ ) spectrum of **7**

**Figure S21.** HRMS spectrum of **7**

**Figure S22.**  $^1\text{H}$  NMR (400 MHz,  $\text{DMSO-d}_6$ ) spectrum of **8**

**Figure S23.**  $^{13}\text{C}$  NMR (101 MHz,  $\text{DMSO-d}_6$ ) spectrum of **8**

**Figure S24.** HRMS spectrum of **8**

**Figure S25.**  $^1\text{H}$  NMR (400 MHz,  $\text{DMSO-d}_6$ ) spectrum of **9**

**Figure S26.**  $^{13}\text{C}$  NMR (101 MHz,  $\text{DMSO-d}_6$ ) spectrum of **9**

**Figure S27.** HRMS spectrum of **9**

**Figure S28.**  $^1\text{H}$  NMR (400 MHz,  $\text{DMSO-d}_6$ ) spectrum of **10**

**Figure S29.**  $^{13}\text{C}$  NMR (101 MHz,  $\text{DMSO-d}_6$ ) spectrum of **10**

**Figure S30.** HRMS spectrum of **10**

**Figure S31.**  $^1\text{H}$  NMR (400 MHz,  $\text{DMSO-d}_6$ ) spectrum of **11**

**Figure S32.**  $^{13}\text{C}$  NMR (101 MHz,  $\text{DMSO-d}_6$ ) spectrum of **11**

**Figure S33.** HRMS spectrum of **11**

**Figure S34.**  $^1\text{H}$  NMR (400 MHz,  $\text{DMSO-d}_6$ ) spectrum of **12**

**Figure S35.**  $^{13}\text{C}$  NMR (101 MHz,  $\text{DMSO-d}_6$ ) spectrum of **12**

**Figure S36.** HRMS spectrum of **12**

**Figure S37.**  $^1\text{H}$  NMR (400 MHz,  $\text{DMSO-d}_6$ ) spectrum of **13**

**Figure S38.**  $^{13}\text{C}$  NMR (101 MHz,  $\text{DMSO-d}_6$ ) spectrum of **13**

**Figure S39.** HRMS spectrum of **13**

**Figure S40.**  $^1\text{H}$  NMR (400 MHz,  $\text{DMSO-d}_6$ ) spectrum of **14**

**Figure S41.**  $^{13}\text{C}$  NMR (101 MHz,  $\text{DMSO-d}_6$ ) spectrum of **14**

**Figure S42.** HRMS spectrum of **14**

**Figure S43.**  $^1\text{H}$  NMR (400 MHz,  $\text{DMSO-d}_6$ ) spectrum of **15**

**Figure S44.**  $^{13}\text{C}$  NMR (101 MHz,  $\text{DMSO-d}_6$ ) spectrum of **15**

**Figure S45.** HRMS spectrum of **15**

**Figure S46.**  $^1\text{H}$  NMR (400 MHz,  $\text{DMSO-d}_6$ ) spectrum of **16**

**Figure S47.**  $^{13}\text{C}$  NMR (101 MHz,  $\text{DMSO-d}_6$ ) spectrum of **16**

**Figure S48.** HRMS spectrum of **16**

**Figure S49.**  $^1\text{H}$  NMR (400 MHz,  $\text{DMSO-d}_6$ ) spectrum of **17**

**Figure S50.**  $^{13}\text{C}$  NMR (101 MHz,  $\text{DMSO-d}_6$ ) spectrum of **17**

**Figure S51.** HRMS spectrum of **17**

**Figure S52.**  $^1\text{H}$  NMR (400 MHz,  $\text{DMSO-d}_6$ ) spectrum of **18**

**Figure S53.**  $^{13}\text{C}$  NMR (101 MHz, DMSO- $\text{d}_6$ ) spectrum of **18**

**Figure S54.** HRMS spectrum of **18**

**Figure S55.**  $^1\text{H}$  NMR (400 MHz, DMSO- $\text{d}_6$ ) spectrum of **19**

**Figure S56.**  $^{13}\text{C}$  NMR (101 MHz, DMSO- $\text{d}_6$ ) spectrum of **19**

**Figure S57.** HRMS spectrum of **19**

**Figure S58.** The effect of 10  $\mu\text{M}$  compound concentration on MDA-MB-231 cell line viability after 24 and 48 h.

**Figure S59.** The effect of 10  $\mu\text{M}$  compound concentration on IGR39 cell viability after 24 h and 48 h.

**Figure S60.** The effect of 10  $\mu\text{M}$  compound concentration on Panc-1 cell line viability after 24, 48, and 72 h.

**Procedure S1.** Evaluation of 10  $\mu\text{M}$  compound concentration effect on cell line viability.

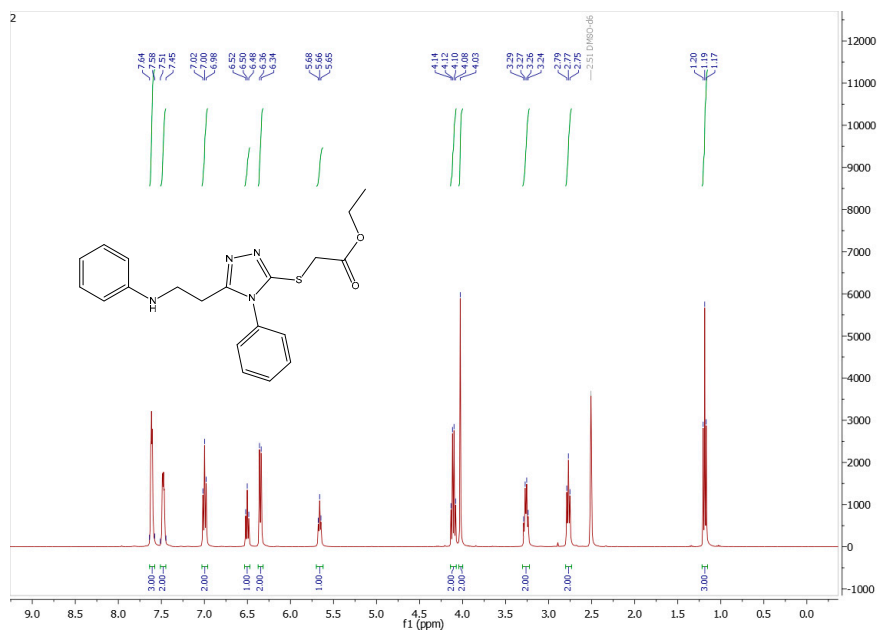

Figure S1. <sup>1</sup>H NMR (400 MHz, DMSO-d<sub>6</sub>) spectrum of 2

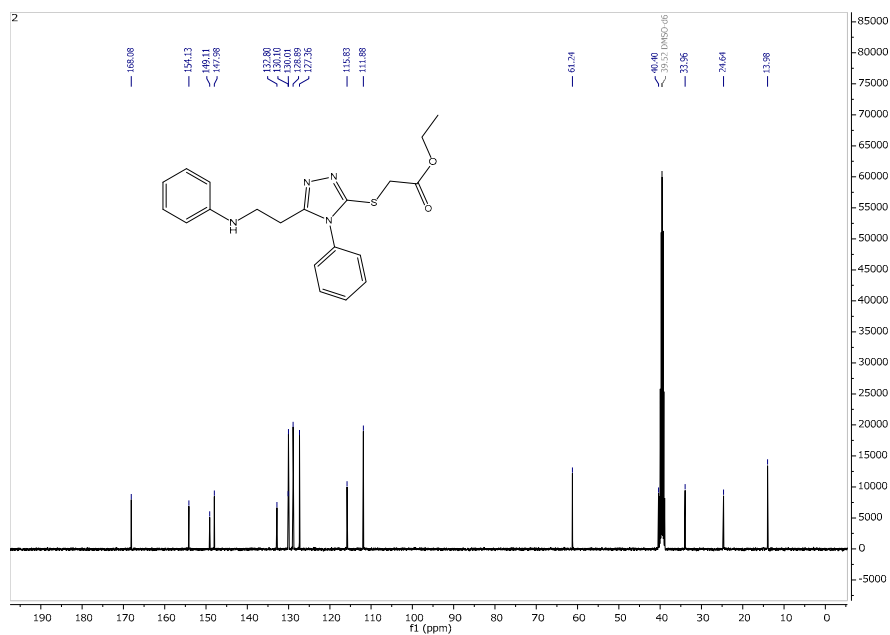

Figure S2. <sup>13</sup>C NMR (101 MHz, DMSO-d<sub>6</sub>) spectrum of 2

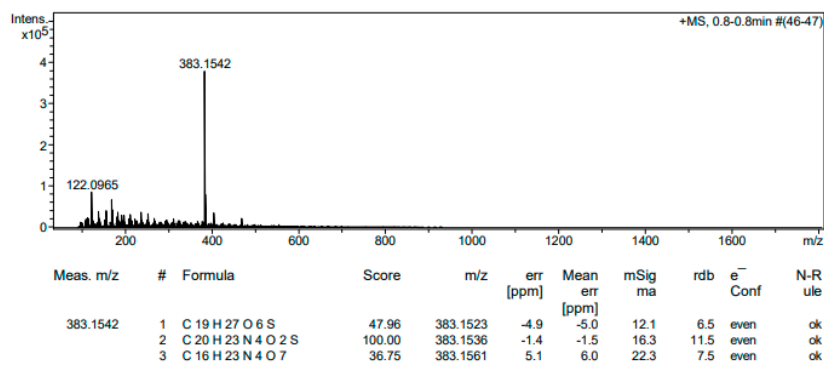

Figure S3. HRMS spectrum of 2

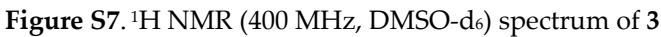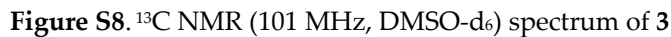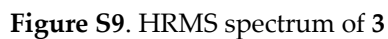

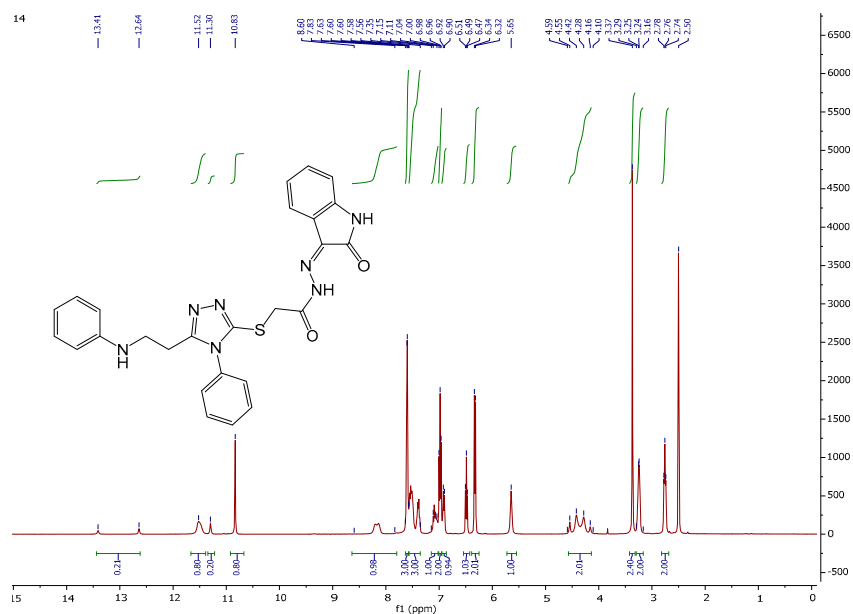

Figure S10. <sup>1</sup>H NMR (400 MHz, DMSO-d<sub>6</sub>) spectrum of 4

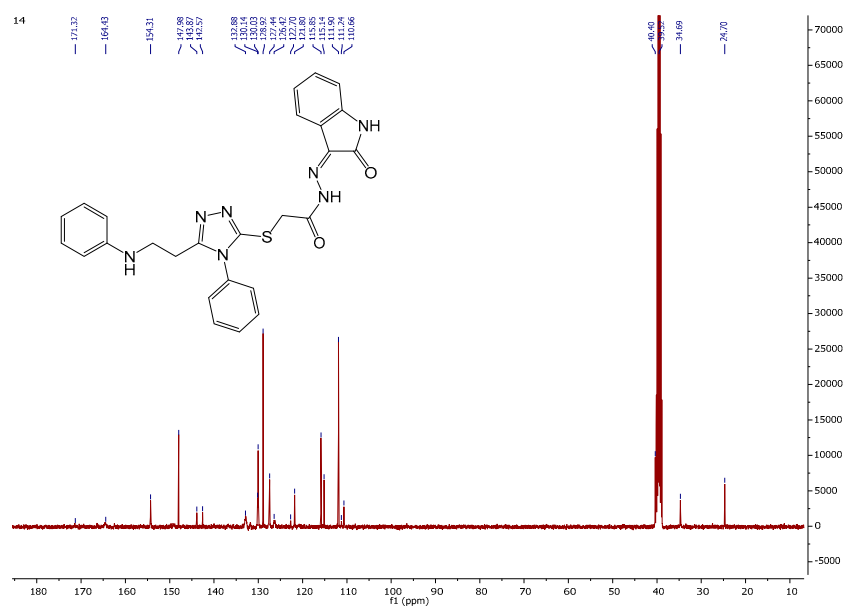

Figure S11. <sup>13</sup>C NMR (101 MHz, DMSO-d<sub>6</sub>) spectrum of 4

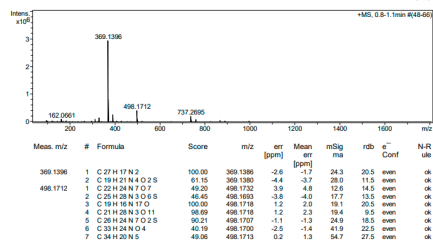

Figure S12. HRMS spectrum of 4

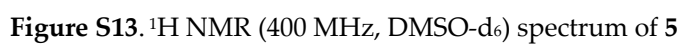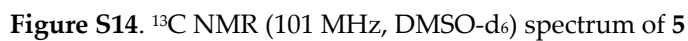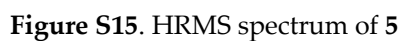

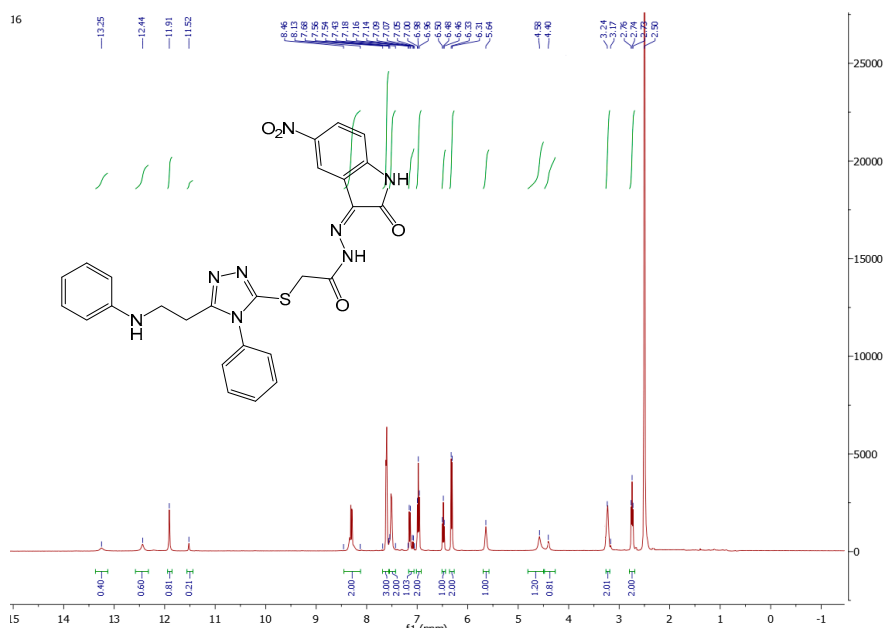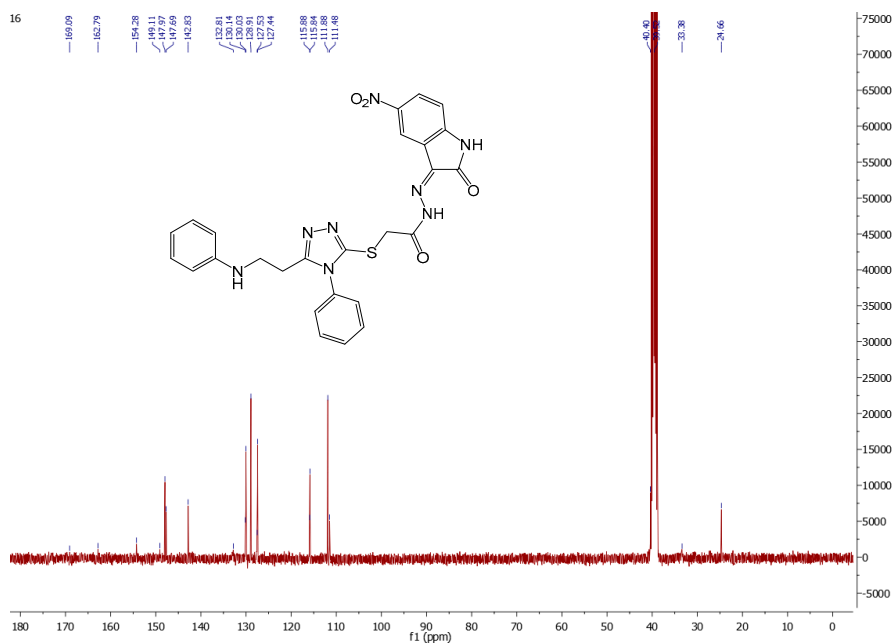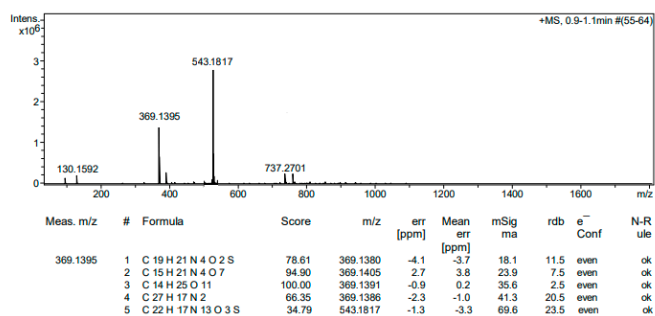



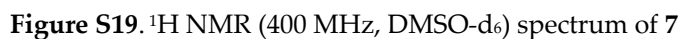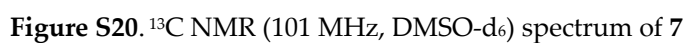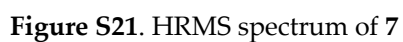

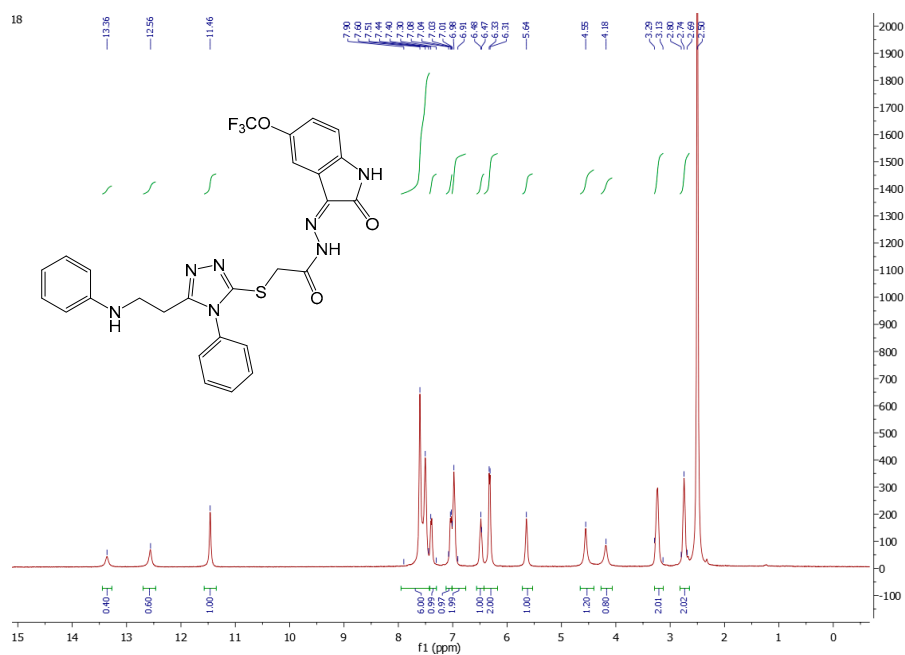

Figure S22. <sup>1</sup>H NMR (400 MHz, DMSO-d<sub>6</sub>) spectrum of 8

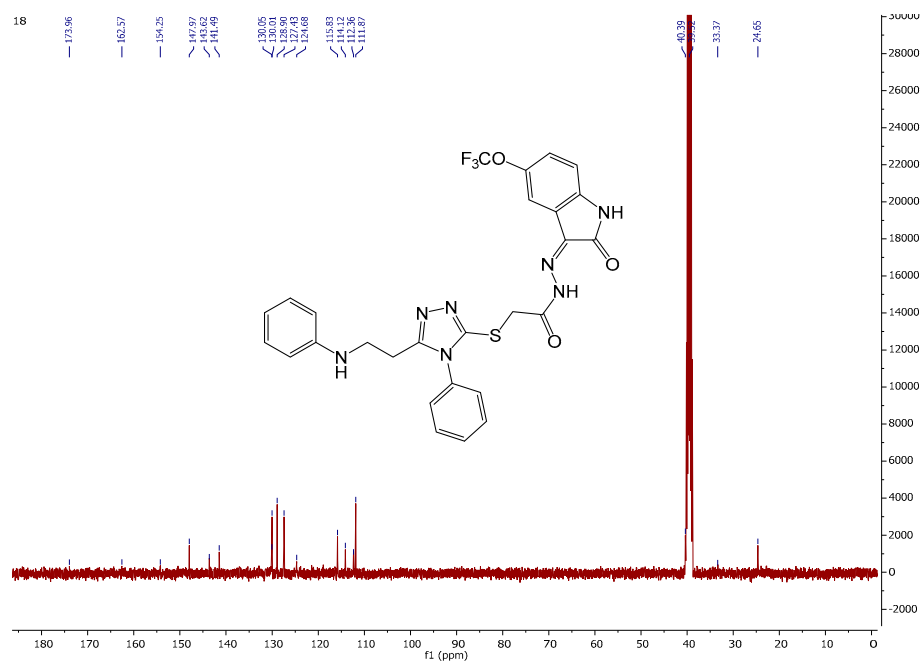

Figure S23. <sup>13</sup>C NMR (101 MHz, DMSO-d<sub>6</sub>) spectrum of 8

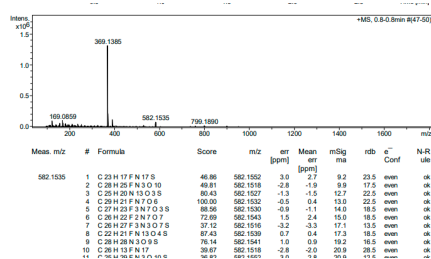

Figure S24. HRMS spectrum of 8

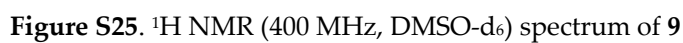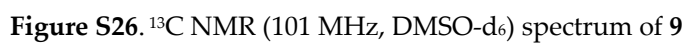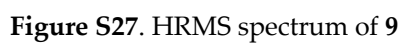

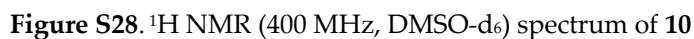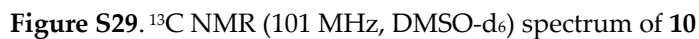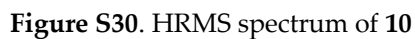

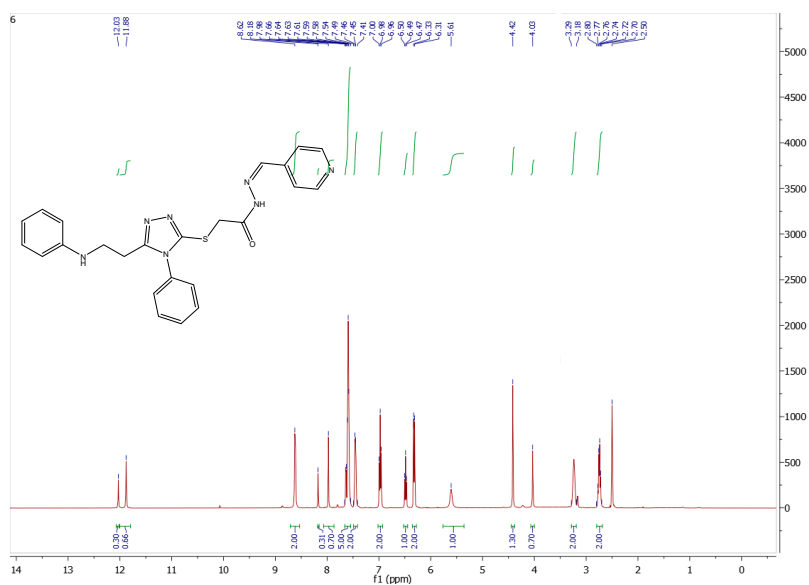

Figure S31. <sup>1</sup>H NMR (400 MHz, DMSO-d<sub>6</sub>) spectrum of 11

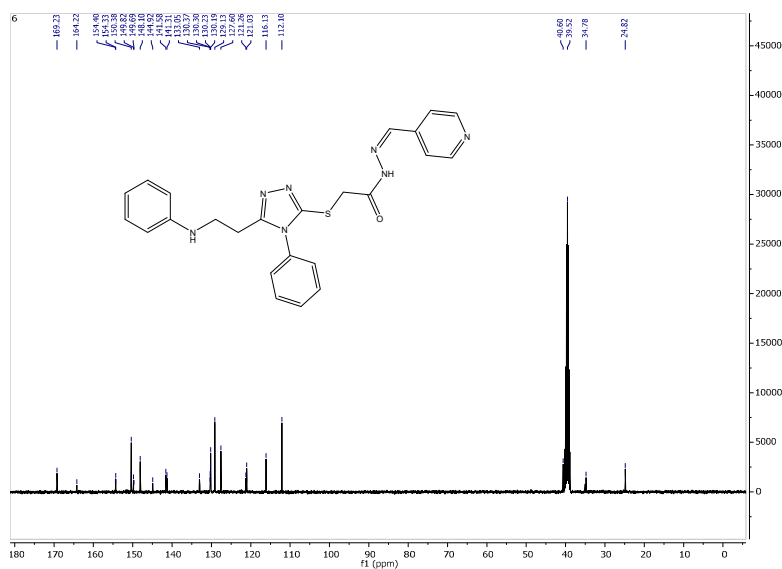

Figure S32. <sup>13</sup>C NMR (400 MHz, DMSO-d<sub>6</sub>) spectrum of 11

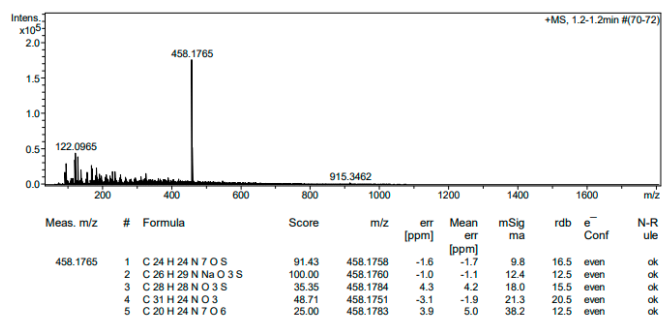

Figure S33. HRMS spectrum of 11

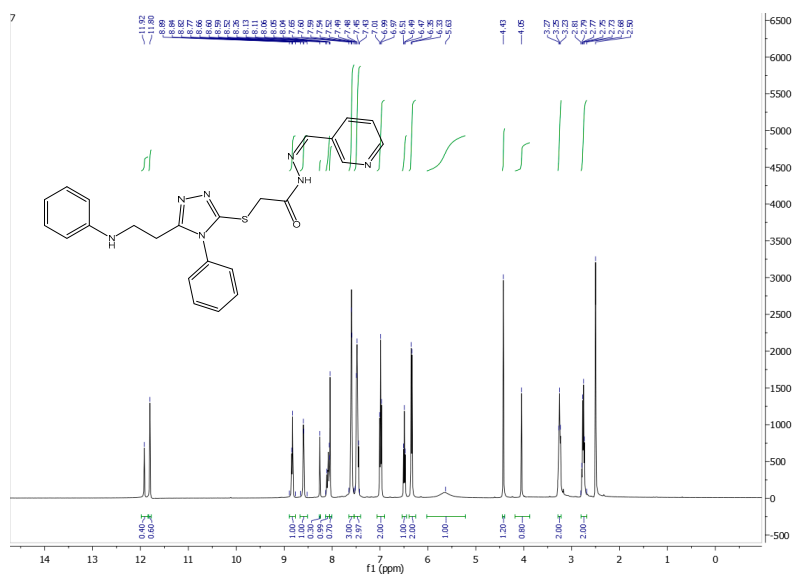

Figure S34.  $^1\text{H}$  NMR (400 MHz,  $\text{DMSO-d}_6$ ) spectrum of 12

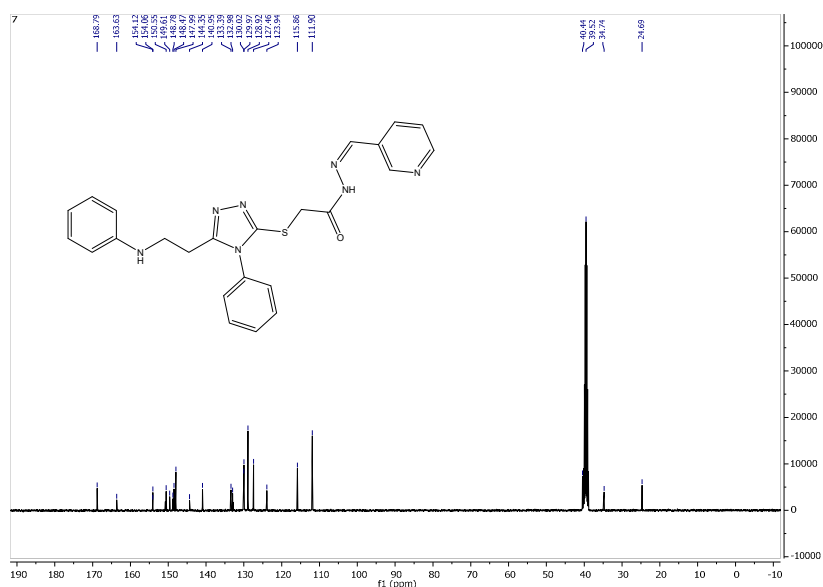

Figure S35.  $^{13}\text{C}$  NMR (101 MHz,  $\text{DMSO-d}_6$ ) spectrum of 12

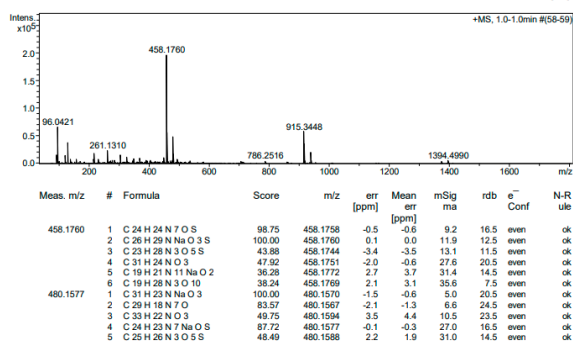

Figure S36. HRMS spectrum of 12

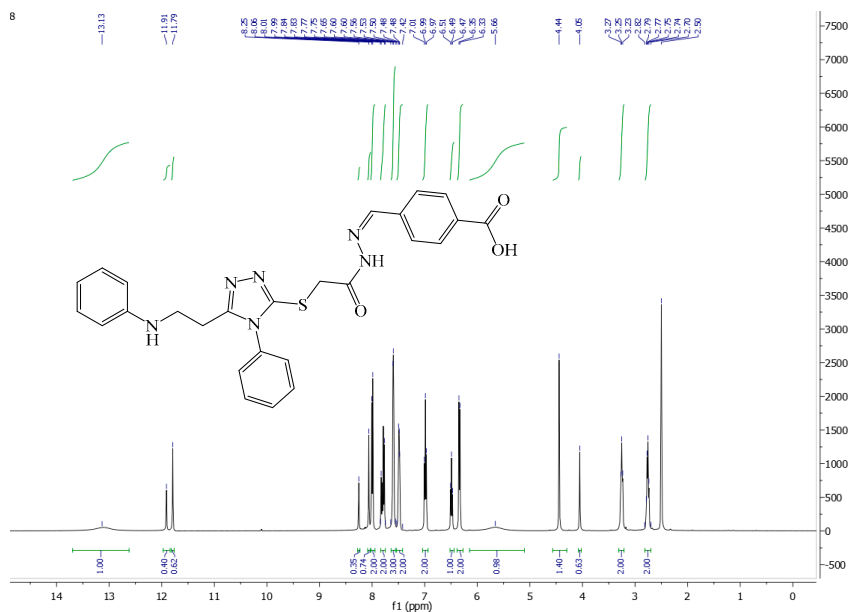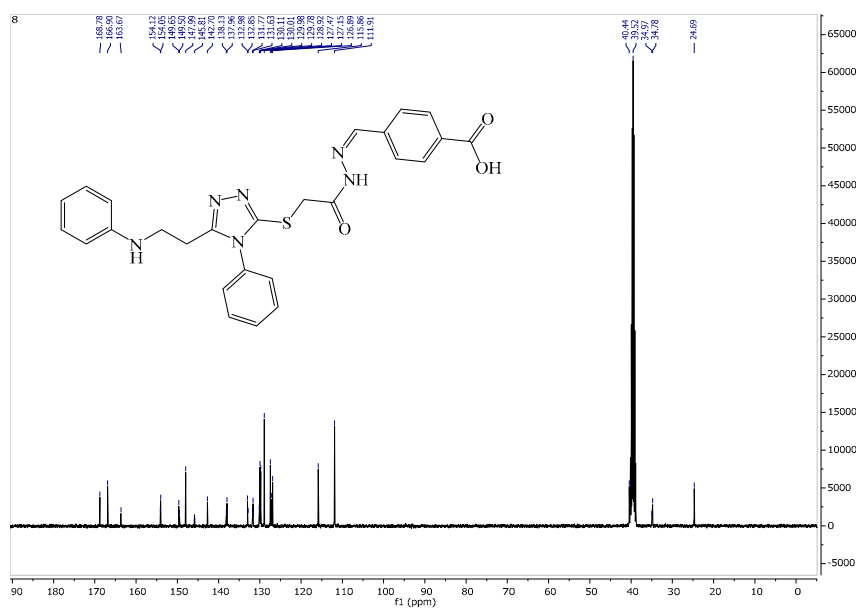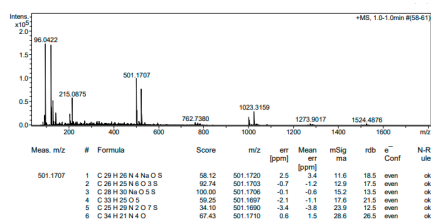

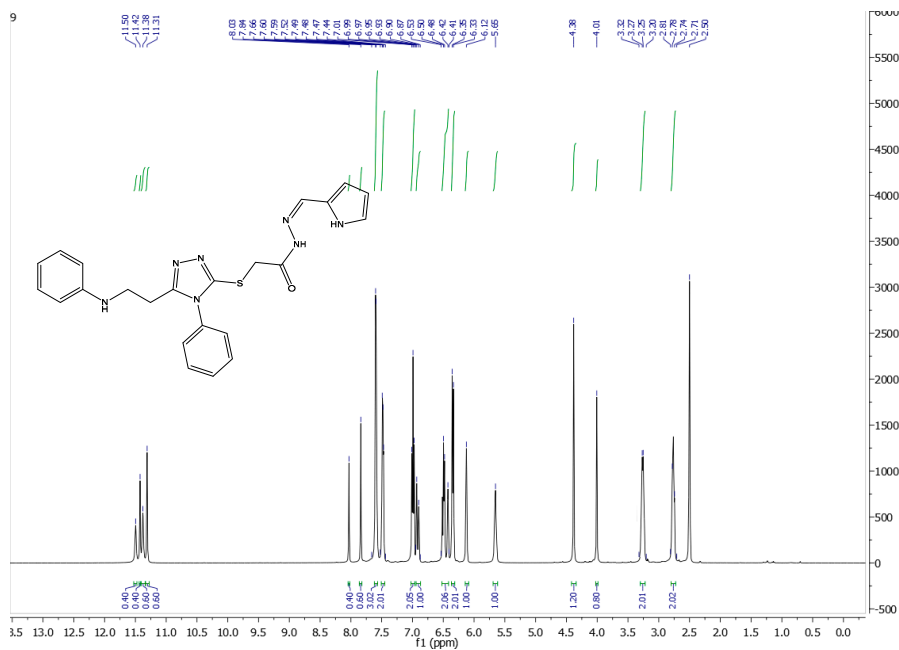

Figure S40.  $^1\text{H}$  NMR (400 MHz,  $\text{DMSO-d}_6$ ) spectrum of 14

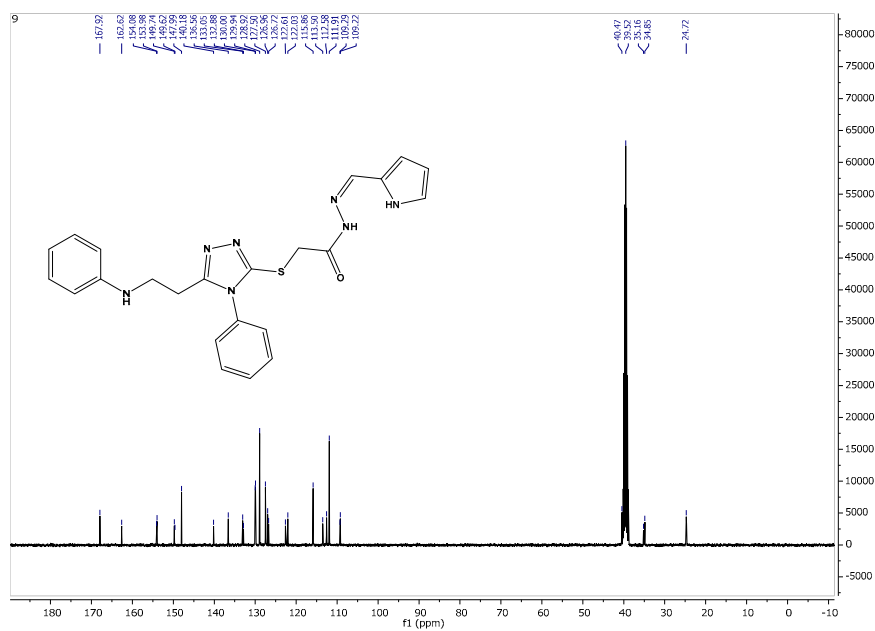

Figure S41.  $^{13}\text{C}$  NMR (101 MHz,  $\text{DMSO-d}_6$ ) spectrum of 14

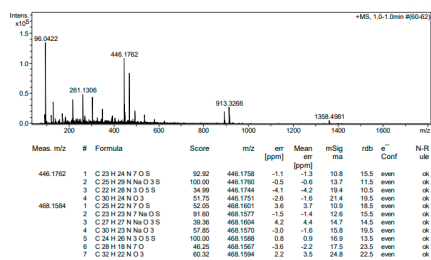

Figure S42. HRMS spectrum of 14



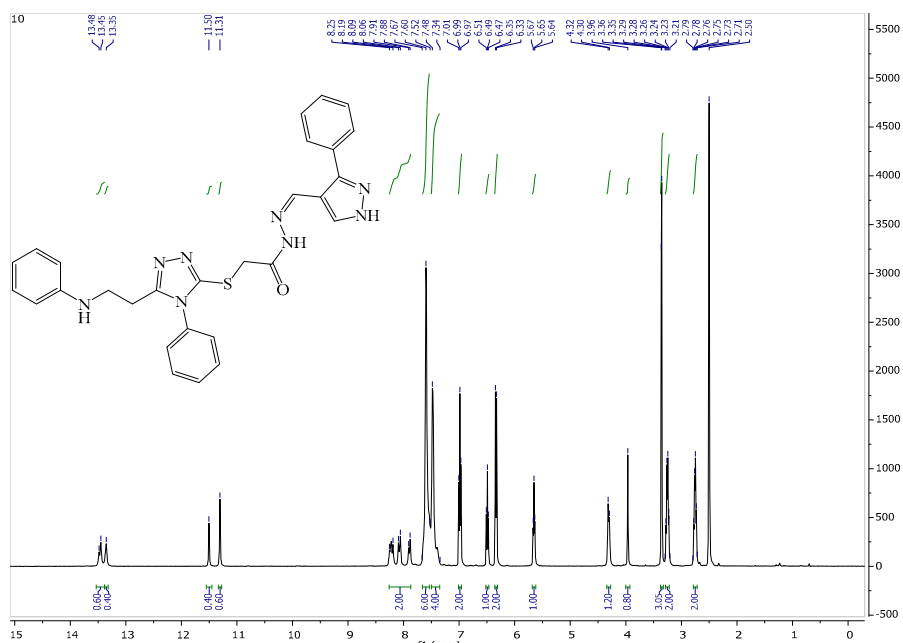

Figure S43. <sup>1</sup>H NMR (400 MHz, DMSO-d<sub>6</sub>) spectrum of 15

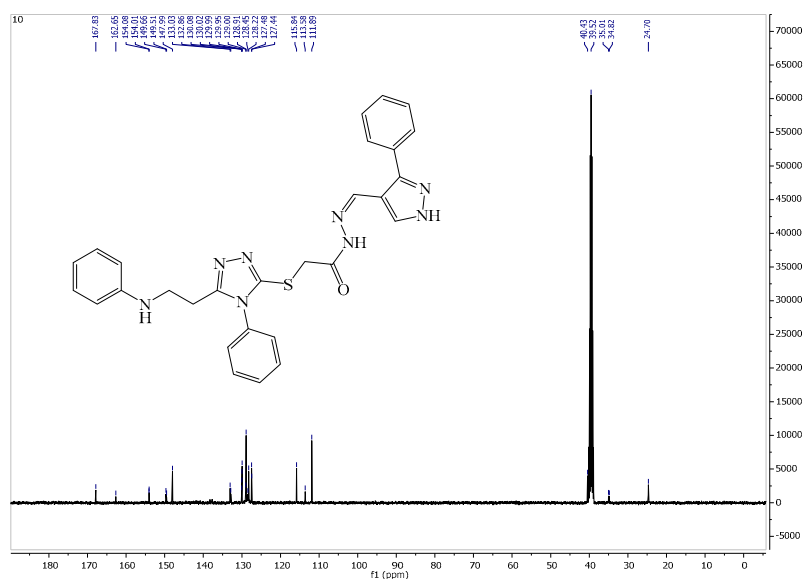

Figure S44. <sup>13</sup>C NMR (101 MHz, DMSO-d<sub>6</sub>) spectrum of 15

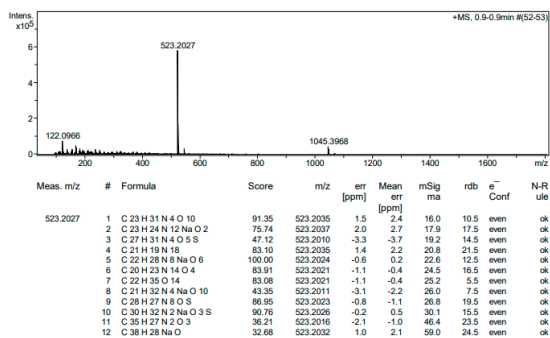

Figure S45. HRMS spectrum of 15

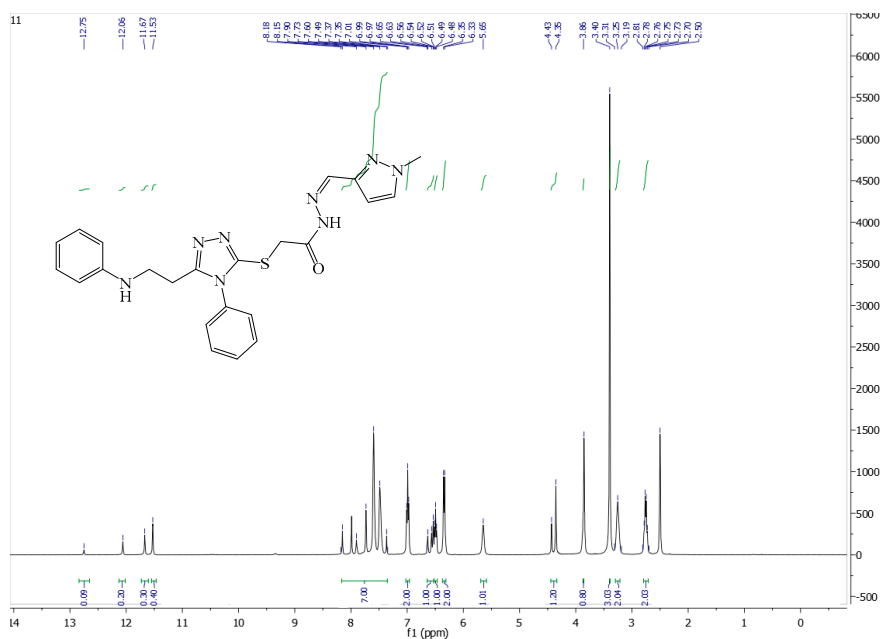

Figure S46. <sup>1</sup>H NMR (400 MHz, DMSO-d<sub>6</sub>) spectrum of 16

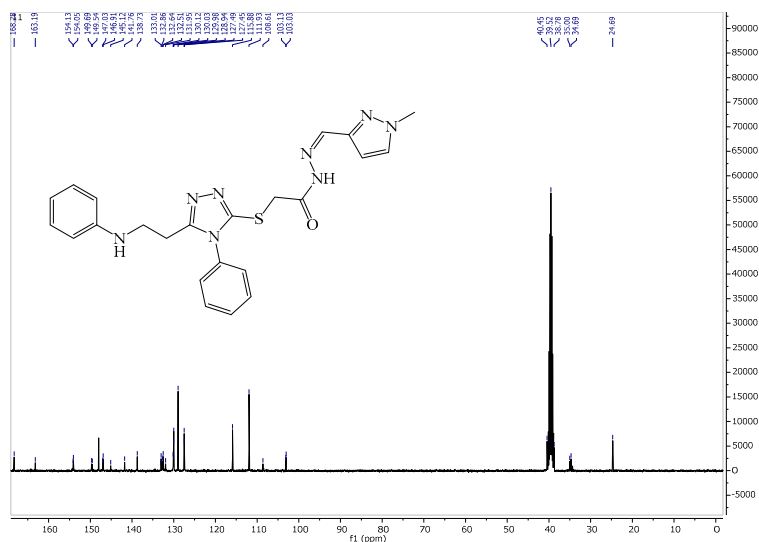

Figure S47. <sup>13</sup>C NMR (101 MHz, DMSO-d<sub>6</sub>) spectrum of 16

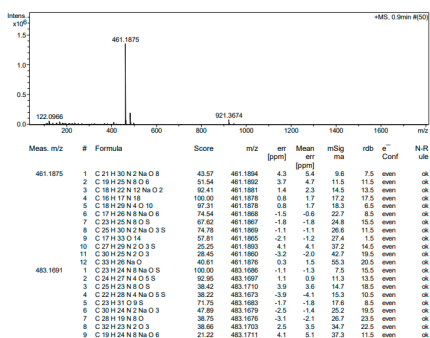

Figure S48. HRMS spectrum of 16

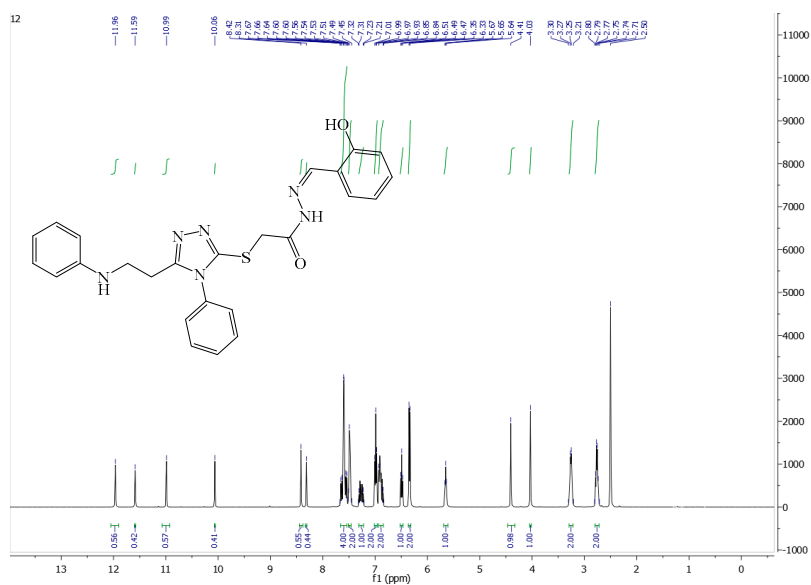

Figure S49. <sup>1</sup>H NMR (400 MHz, DMSO-d<sub>6</sub>) spectrum of 17

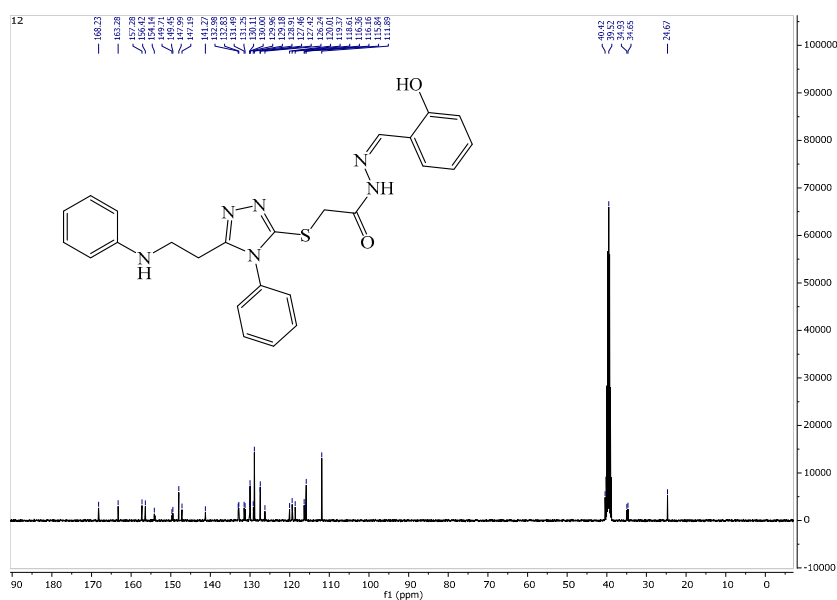

Figure S50. <sup>13</sup>C NMR (101 MHz, DMSO-d<sub>6</sub>) spectrum of 17

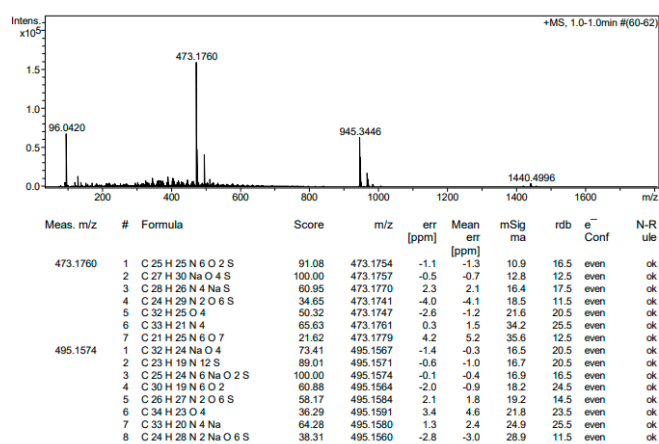

Figure S51. HRMS spectrum of 17

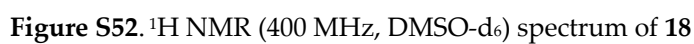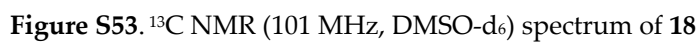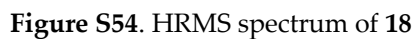



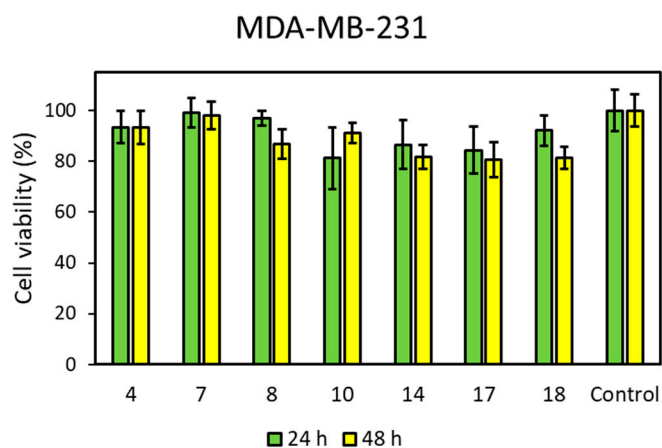

**Figure S58.** The effect of 10  $\mu$ M compound concentration on MDA-MB-231 cell line viability after 24 and 48 h.

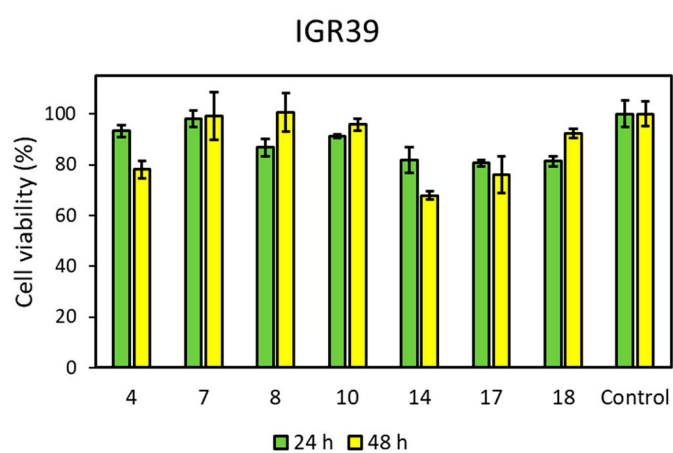

**Figure S59.** The effect of 10  $\mu$ M compound concentration on IGR39 cell line viability after 24 and 48 h.

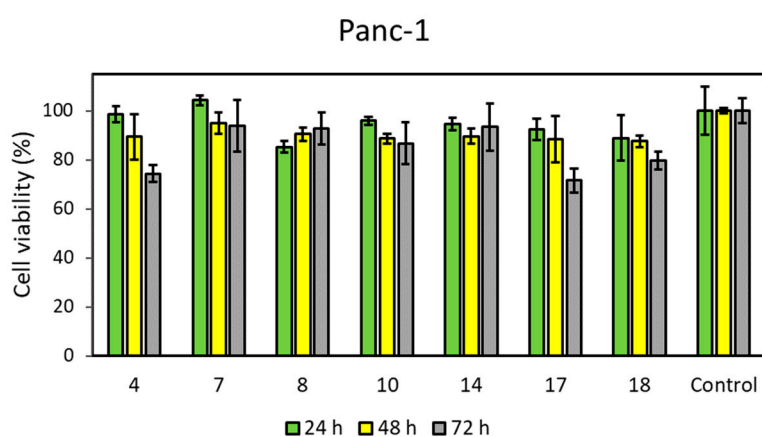

**Figure S60.** The effect of 10  $\mu$ M compound concentration on Panc-1 cell line viability after 24, 48, and 72 h.

**Procedure S1.** Evaluation of 10  $\mu$ M compound concentration effect on cell line viability.

The effect of 10  $\mu$ M compounds on cell viability was studied using 3-(4,5-dimethylthiazol-2-yl)-2,5-diphenyltetrazolium bromide (MTT; Sigma-Aldrich Co., St Louis, MO, USA) assay. IGR39, MDA-MB-231, and Panc-1 cells were seeded in 96-well plates (Corning) in triplicates at a volume of 100  $\mu$ L at  $4 \times 10^3$  cells/well). After 24 h, the cells were treated with 10  $\mu$ M of compounds **4**, **7**, **8**, **10**, **14**, **17**, and **18**. After 24 h, 48 h and 72 h (only Panc-1 cells), the MTT reagent has been added and cells were incubated for 4 h. Then the medium was aspirated, and the formed formazan crystals were dissolved in 100  $\mu$ L DMSO (Sigma-Aldrich Co., St. Louis, MO, USA). The absorbance was measured at 570 and 630 nm using a multi-detection microplate reader. Compound effect on cell viability was calculated according to a formula:

$$\text{Relative cell viability (\%)} = \frac{A - A_0}{A_{NC} - A_0}$$

Where:

A – mean of absorbance of tested compound,

A<sub>0</sub> – mean of absorbance of blank (no cells, positive control),

A<sub>NC</sub> – mean of absorbance of negative control (only cells, no treatment).
